# Supplementary material for: Diversity in bacterium-host interactions within the species Helicobacter heilmannii sensu stricto
Source: PubMed Central journal article supplement (PMC3750284; doi:10.1186/1297-9716-44-65), 2013-07-29

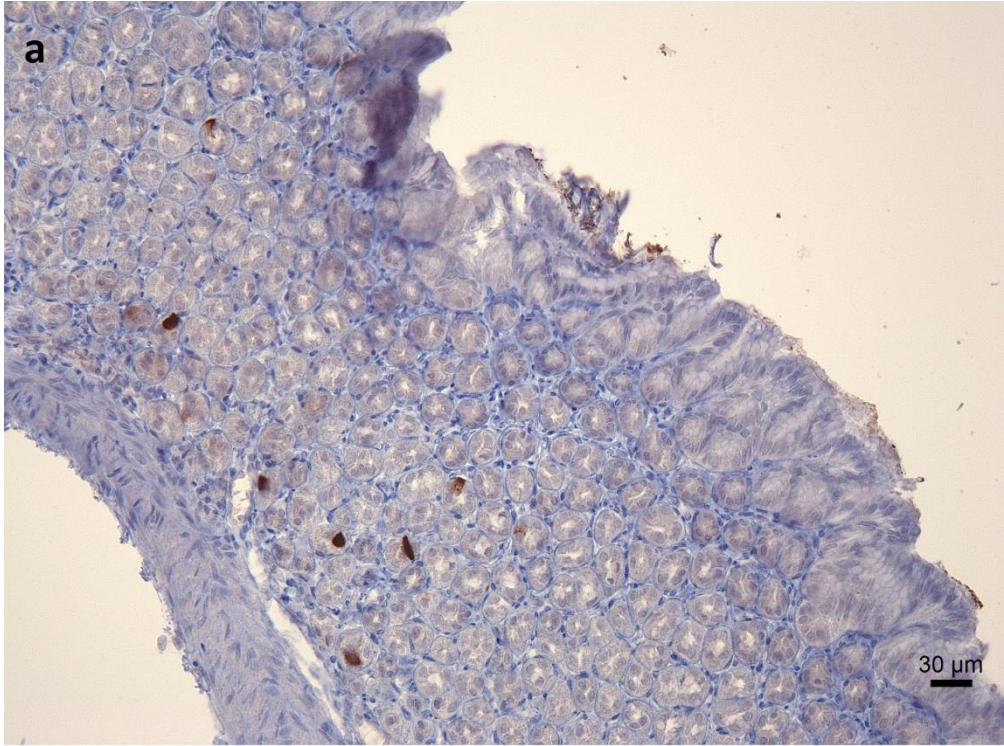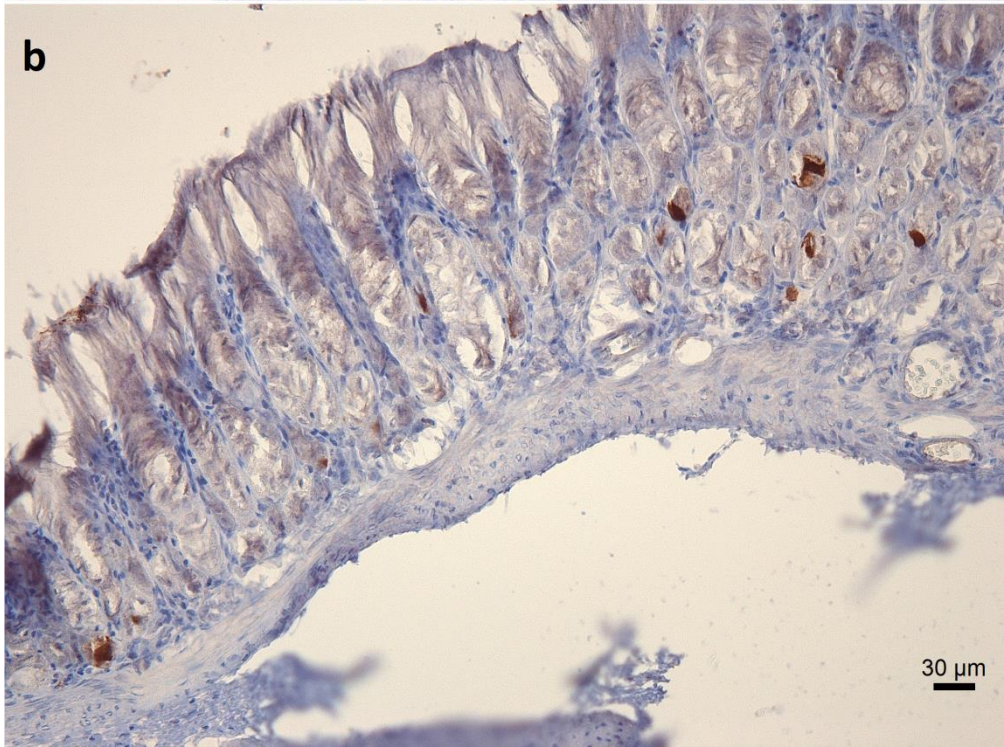

Supplement: 1297-9716-44-65-S3.pdf [file 1297-9716-44-65-S3.pdf]
